# Supplementary material
Source: PubMed Central journal article supplement (PMC7851760)

Supplementary Figure S1

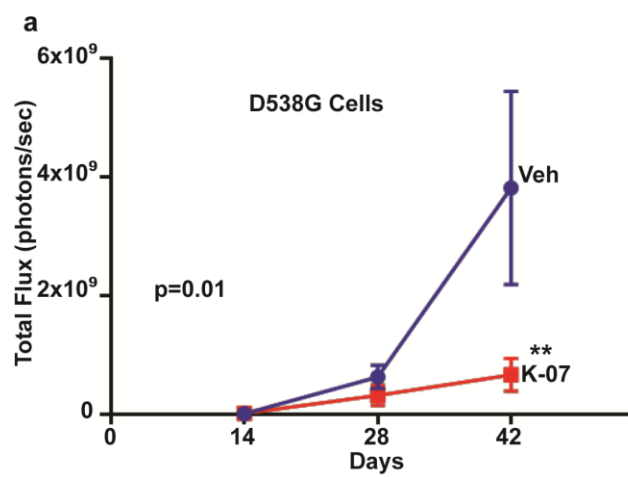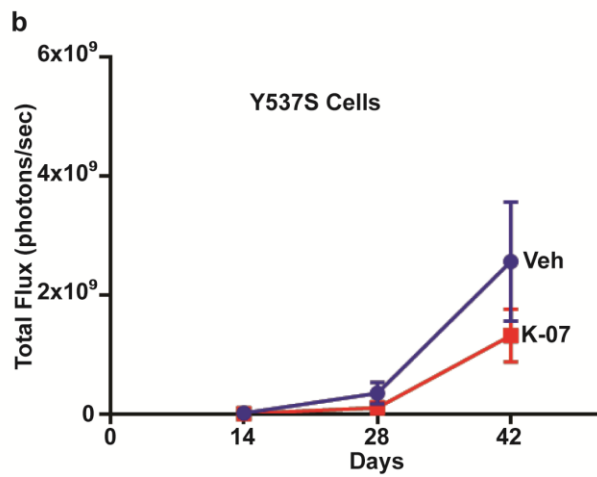

Supplement: NIHMS1663004-supplement-1.pdf [file NIHMS1663004-supplement-1.pdf]
